# Supplementary material
Source: PubMed Central journal article supplement (PMC2651146)
Supplement: NIHMS91439-supplement-1_si_001.pdf [file NIHMS91439-supplement-1_si_001.pdf]

## Supporting Information for:

### A Surprising Mechanistic “Switch” in Lewis Acid Activation: A Bifunctional, Asymmetric Approach to $\alpha$ -Hydroxy Acid Derivatives

Ciby J. Abraham, Daniel H. Paull, Tefsit Bekele, Michael T. Scerba, Travis Dudding, and Thomas Lectka\*

*Department of Chemistry, Johns Hopkins University, 3400 N. Charles St., Baltimore, MD 21218*

**General.** Unless otherwise stated, all reactions were carried out under anhydrous, air-free conditions. All solvents were dried and distilled by standard procedures. The  $^1\text{H}$  and  $^{13}\text{C}$  NMR spectra were acquired on a Bruker Avance 400 MHz spectrometer. The  $^1\text{H}$  (400 MHz) and  $^{13}\text{C}$  (101 MHz) chemical shifts are given in parts per million ( $\delta$ ) with respect to internal TMS standards and residual chloroform or DMSO. FT-IR spectra were recorded on a Bruker IFS-55 spectrometer and optical rotations were recorded on a Perkin Elmer 120 polarimeter at room temperature. Enantiomeric ratios were obtained by HPLC using the Chiracel OD or Whelk-01; compounds **7d**, **7f**, **7g**, **10** and **11** were derivatized by benzylation prior to HPLC analysis. Benzoylquinidine **2a** was formed from quinidine (Sigma) and benzoyl chloride according to the method of Pracejus.<sup>1</sup> The  $(\text{Ph}_3\text{P})_2\text{Pd}(\text{SbF}_6)_2$  was made from  $(\text{Ph}_3\text{P})_2\text{PdCl}_2$  and  $\text{AgSbF}_6$ , and  $(\text{Ph}_3\text{P})_2\text{CuClO}_4$  was made in situ from  $(\text{ACN})_4\text{CuClO}_4$  and  $\text{PPh}_3$ .<sup>2</sup> All other chemicals were purchased from Aldrich Chemical Corporation, Alfa Aesar, and Acros Organics. Main paper references numbered (4),<sup>3</sup> (6),<sup>4</sup> and (7)<sup>5</sup> contain more than 15 authors and therefore are listed in their full form here.

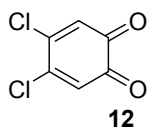

**Procedure for 4,5-dichlorocyclohexa-3,5-diene-1,2-dione (12).** 1.0 g (5.59 mmol) of 4,5-dichlorocatechol<sup>6</sup> and 0.396 g (6.15 mmol) of MnO<sub>2</sub> were added to 25 mL of THF at 0 °C. The reaction was allowed to warm up to room temperature over a period of 1 h and stirred until all the starting material was consumed by TLC. The reaction was filtered and the filtrate was concentrated *in vacuo*. The residue was crystallized using CH<sub>2</sub>Cl<sub>2</sub>/hexanes. Yellow crystalline solid: % yield = 52; mp = 81-83° C; <sup>1</sup>H NMR (CDCl<sub>3</sub>) δ 7.41 (s, 2H) ppm; <sup>13</sup>C NMR (CDCl<sub>3</sub>) δ 180.3, 158.2, 120.7 ppm; IR (CH<sub>2</sub>Cl<sub>2</sub>) 1705 cm<sup>-1</sup>. Anal. Calcd. for C<sub>6</sub>H<sub>2</sub>Cl<sub>2</sub>O<sub>2</sub> C, 40.72; H, 1.14. Found C, 40.68; H, 1.13.

**General procedure for the synthesis of α-hydroxy oxygenated derivatives (7d, 7f, 7g, 7h):** Benzoylquinidine **2a** (0.04 mmol) and *trans*-(PPh<sub>3</sub>)<sub>2</sub>PdCl<sub>2</sub> (0.04 mmol) were placed into a 25 mL round bottom flask equipped with a magnetic stir bar and were dissolved in 3 mL of THF. The flask was cooled to -78 °C and Hünig's base (0.4 mmol) was added to the reaction flask followed by propionyl chloride (0.4 mmol), as a solution in 2 mL of THF. *o*-Chloranil **4** (0.4 mmol) as a solution in 2 mL of THF was added via syringe pump for 6 h. The reaction (**7d**) was quenched using 3 mL of MeOH (**7f**, 3mL of H<sub>2</sub>O; **7g**, 1.0 eq. of NH<sub>4</sub>OH; **7h**, 1.0 eq. thiophenol) and warmed to rt. Once the reaction was completed by TLC, 10 mL of CH<sub>2</sub>Cl<sub>2</sub> was added to the reaction mixture and washed with 3 mL of H<sub>2</sub>O (3X). The organic layer was dried using MgSO<sub>4</sub> and concentrated under reduced pressure. The residue was then dissolved in 2.6 mL of 4:1 (CH<sub>3</sub>CN/H<sub>2</sub>O) in a round bottom flask equipped with a magnetic stir bar. Cerium ammonium nitrate (0.14 mmol) was added to the reaction at 0 °C and allowed to stir overnight to room temperature. Water was then added and the solution was extracted 3X with EtOAc. The organic layer was dried with MgSO<sub>4</sub> and concentrated *in vacuo*. The crude product was then columned using EtOAc/hexanes.

Note: Compounds **7d**, **7f**, **7g**, **10** and **11** were derivatized by benzylation prior to HPLC analysis. **Representative derivatization procedure:** pure α-hydroxy derivative **7d** was stirred with benzyl chloride in DMF at 0 °C, and 1 equiv. NaH (60% dispersion) was added to the solution and the mixture was stirred at 0 °C until TLC indicated reaction

completion. Water was added and the product was extracted with diethyl ether, washed with dilute HCl and bicarbonate solutions successively, dried with MgSO<sub>4</sub> and filtered through a short plug of silica after partial dilution with hexanes to give pure product after solvent and excess benzyl chloride were removed under vacuum.

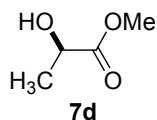

**(R)-methyl 2-hydroxypropanoate (7d).**<sup>7</sup> Clear oil: % yield = 88; % ee = 96;  $[\alpha]_D = +7.5^\circ$  (c = 1.5, dioxane); <sup>1</sup>H NMR (CDCl<sub>3</sub>)  $\delta$  4.28 (q, 1H), 3.79 (s, 3H), 3.02 (bs, 1H), 1.47 (d, 3H) ppm; <sup>13</sup>C NMR (CDCl<sub>3</sub>)  $\delta$  179.8, 68.9, 54.6, 18.5 ppm; IR (CH<sub>2</sub>Cl<sub>2</sub>) 3511, 1744 cm<sup>-1</sup>. HPLC (benzyl derivative, column = Whelk-01, 10% *i*-PrOH/hexanes, 1.0 mL/min) (R) = 9.19, (S) = 10.56. Anal. Calcd. for C<sub>4</sub>H<sub>8</sub>O<sub>3</sub> C, 46.15; H, 7.75. Found C, 46.10; H, 7.73.

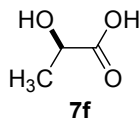

**(R)-2-hydroxypropanoic acid (7f).**<sup>8</sup> Residue: % yield = 87; % ee = 97;  $[\alpha]_D = +13.5^\circ$  (c = 1.5, 1.5 N NaOH); <sup>1</sup>H NMR (CDCl<sub>3</sub>)  $\delta$  4.27 (q, 1H), 3.00 (bs, 1H), 1.38 (d, 3H) ppm; <sup>13</sup>C NMR (CDCl<sub>3</sub>)  $\delta$  180.7, 71.5, 22.6 ppm; IR (CH<sub>2</sub>Cl<sub>2</sub>) 3500-3400, 1724 cm<sup>-1</sup>. HPLC (benzyl derivative, column = Whelk-01, 10% *i*-PrOH/hexanes, 1.0 mL/min) (R) = 7.74, (S) = 8.92. Anal. Calcd. for C<sub>3</sub>H<sub>6</sub>O<sub>3</sub> C, 40.00; H, 6.71. Found C, 40.11; H, 6.73.

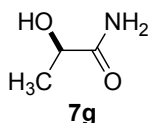

**(R)-2-hydroxypropanamide (7g).**<sup>9</sup> White crystalline solid: % yield = 82; % ee = 80; mp = 51-52° C;  $[\alpha]_D = +11.4^\circ$  (c = 0.25, Methanol:Ethanol (1:1)); <sup>1</sup>H NMR (CH<sub>3</sub>OD) δ 4.11 (q, 1H), 1.37 (d, 3H) ppm; <sup>13</sup>C NMR (CH<sub>3</sub>OD) δ 177.3, 66.9, 18.7 ppm; IR (CH<sub>2</sub>Cl<sub>2</sub>) 3512, 3480, 1701 cm<sup>-1</sup>. HPLC (benzyl derivative, column = Whelk-01, 20% *i*-PrOH/hexanes, 1.0 mL/min) (R) = 10.09, (S) = 11.76. Anal. Calcd. for C<sub>3</sub>H<sub>7</sub>NO<sub>2</sub> C, 40.44; H, 7.92; N, 15.72. Found C, 40.46; H, 7.89; N, 15.68.

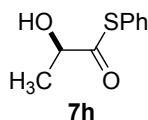

**(R)-S-phenyl 2-hydroxypropanethioate (7h).**<sup>10</sup> Clear oil: % yield = 80; % ee = 92;  $[\alpha]_D = +13.5^\circ$  (c = 1.5, 1.5 N NaOH); <sup>1</sup>H NMR (CDCl<sub>3</sub>) δ 7.41-7.39 (m, 5H), 4.44 (q, 1H) 2.85 (bs, 1H), 1.51 (d, 3H) ppm; <sup>13</sup>C NMR (CDCl<sub>3</sub>) δ 188.3, 138.4, 130.6, 130.5, 129.7, 129.5, 126.3, 69.5, 20.8 ppm; IR (CH<sub>2</sub>Cl<sub>2</sub>) 3418, 1710 cm<sup>-1</sup>. HPLC (Whelk-01, 15% *i*-PrOH/hexanes, 1.0 mL/min) (R) = 7.74, (S) = 8.92. Anal. Calcd. for C<sub>9</sub>H<sub>10</sub>O<sub>2</sub>S C, 59.32; H, 5.53. Found C, 59.28.6; H, 5.56.

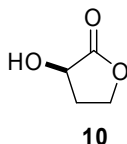

**Procedure for 3-hydroxy-dihydrofuran-2(3H)-one (10)**<sup>11</sup>: Benzoylquinidine **2a** (0.04 mmol) and *trans*-(PPh<sub>3</sub>)<sub>2</sub>PdCl<sub>2</sub> (0.04 mmol) were placed into a 25 mL round bottom flask equipped with a magnetic stir bar and were dissolved in 3 mL of THF. The flask was cooled to -78 °C and Hünig's base (0.4 mmol) was added to the reaction flask followed by 4-benzyloxybutyryl chloride<sup>12</sup> (0.4 mmol), as a solution in 2 mL of THF. *o*-Chloranil **4** (0.4 mmol) as a solution in 2 mL of THF was added via syringe pump for 8 h. The reaction was quenched using 3 mL of H<sub>2</sub>O and warmed to rt. Once the reaction was completed by TLC, 10 mL of EtOH was added to the reaction mixture followed by a

catalytic amount of acetic acid and Pd/C and hydrogenated for 8 h. The solution was filtered through celite and the filtrate was concentrated *in vacuo*. The residue was taken up in 10 mL of toluene and a catalytic amount of PTSA was added to the reaction mixture and refluxed for 10 h using a Dean-Stark trap. The reaction was concentrated under reduced pressure and the residue was dissolved in 2.6 mL of 4:1 (CH<sub>3</sub>CN/H<sub>2</sub>O) in a round bottom flask equipped with a magnetic stir bar. Cerium ammonium nitrate (0.14 mmol) was added to the reaction at 0° C and stirred overnight. Water was then added and the mixture was extracted 3X with EtOAc. The organic layer was dried with MgSO<sub>4</sub> and concentrated *in vacuo*. The crude product was then columned using 10% ETOAc/hexanes. Clear oil: % yield = 88; % ee = >99; [α]<sub>D</sub> = +61.5° (c = 1.15, CHCl<sub>3</sub>); <sup>1</sup>H NMR (CDCl<sub>3</sub>) δ 4.28 (m, 1H), 4.21-4.17 (m, 2H), 3.17 (bs, 1H), 2.2-2.8 (m, 2H) ppm; <sup>13</sup>C NMR (CDCl<sub>3</sub>) δ 188.3, 68.3, 66.6, 25.4 ppm; IR (CH<sub>2</sub>Cl<sub>2</sub>) 3545, 1788 cm<sup>-1</sup>. HPLC (benzyl derivative, column = Whelk-01, 5% *i*-PrOH/hexanes, 1.0 mL/min) (R) = 12.60, (S) = 9.30. Anal. Calcd. for C<sub>4</sub>H<sub>6</sub>O<sub>3</sub> C, 47.06; H, 5.92. Found C, 47.07; H, 5.93.

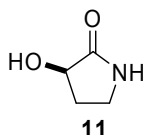

**Procedure for (S)-3-hydroxypyrrolidin-2-one (11)**<sup>13</sup>: Benzoylquinidine **2a** (0.04 mmol) and *trans*-(PPh<sub>3</sub>)<sub>2</sub>PdCl<sub>2</sub> (0.04 mmol) were placed into a 25 mL round bottom flask equipped with a magnetic stir bar and were dissolved in 3 mL of THF. The flask was cooled to -78 °C and Hünig's base (0.4 mmol) was added to the reaction flask followed by 4-chlorobutyryl chloride (0.4 mmol), as a solution in 2 mL of THF. *o*-Chloranil **4** (0.4 mmol) as a solution in 2 mL of THF was added via syringe pump for 8 h. The reaction was quenched using NH<sub>4</sub>OH (0.4 mmol) and warmed to rt. Once the reaction was completed by TLC, the reaction was concentrated *in vacuo*. The residue was dissolved in 3 mL of THF and NaH (0.4 mmol) followed by 15-crown-5 (0.04 mmol) were added to the solution at room temperature. After 5 h, the reaction was diluted with 10 mL of CH<sub>2</sub>Cl<sub>2</sub> and washed 3X with H<sub>2</sub>O in a separatory funnel. The organic layer was dried

using MgSO<sub>4</sub> and concentrated *in vacuo*. The residue was then dissolved in 2.6 mL of 4:1 (CH<sub>3</sub>CN/H<sub>2</sub>O) in a round bottom flask equipped with a magnetic stir bar. Cerium ammonium nitrate (0.14 mmol) was added to the reaction at 0° C and stirred overnight. Water was then added and the mixture was extracted 3X with EtOAc. The organic layer was dried with MgSO<sub>4</sub> and concentrated *in vacuo*. The crude product was then columned using 50% EtOAc/hexanes. White crystalline solid: % yield = 82; % ee = >99; mp= 100-103° C; [α]<sub>D</sub> = +61.5° (c = 120.4, CHCl<sub>3</sub>); <sup>1</sup>H NMR (CDCl<sub>3</sub>) δ 7.22 (bs, 1H), 4.75 (bs, 1H), 4.30 (t, 1H), 3.32 (m, 2H), 2.45 (m, 1H), 2.08 (m, 1H) ppm; <sup>13</sup>C NMR (CDCl<sub>3</sub>) δ 178.3, 69.8, 38.9, 30.0 ppm; IR (CH<sub>2</sub>Cl<sub>2</sub>) 3228, 1712 cm<sup>-1</sup>; HPLC (benzyl derivative, column = Whelk-01, 1% *i*-PrOH/hexanes, 1.0 mL/min) (R) = 7.35, (S) = 6.55. Anal. Calcd. for C<sub>4</sub>H<sub>7</sub>NO<sub>2</sub> C, 47.52; H, 6.98; N, 13.85. Found C, 47.58; H, 6.96; N, 13.81.

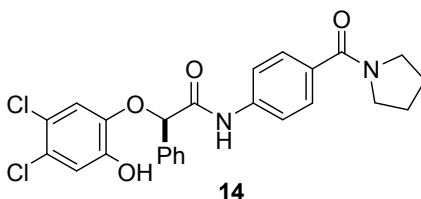

**Prodecure for (R)-2-(4,5-dichloro-2-hydroxyphenoxy)-2-phenyl-N-(4-(pyrrolidine-1-carbonyl)-phenyl)acetamide (14)<sup>14</sup>:** Benzoylquinidine **2a** (0.04 mmol) and *trans*-(PPh<sub>3</sub>)<sub>2</sub>PdCl<sub>2</sub> (0.04 mmol) were placed into a 25 mL round bottom flask equipped with a magnetic stir bar and were dissolved in 3 mL of THF. The flask was cooled to -78 °C and Hünig's base (0.4 mmol) was added to the reaction flask followed by phenylacetyl chloride (0.4 mmol), as a solution in 2 mL of THF. *o*-Quinone **12** (0.4 mmol) as a solution in 2 mL of THF was added via syringe pump for 8 h. The reaction was quenched using **13**<sup>15</sup> (0.4 mmol) in 2 mL of THF and then refluxed for 6 h. Once the reaction was completed by TLC, the reaction was concentrated *in vacuo*. The crude product was then columned using 30% EtOAc/hexanes. Light tan solid: % yield = 93; % ee = >99; mp= 181-183° C; [α]<sub>D</sub> = +28.5° (c = 0.010, CHCl<sub>3</sub>); <sup>1</sup>H NMR (CDCl<sub>3</sub>) δ 9.02 (s, 1H), 7.42-7.63 (m, 9H), 7.18 (s, 1H), 6.72 (d, 2H), 5.28 (s, 1H), 3.4-3.6 (m, 4H), 1.74-1.97 (m, 4H) ppm; <sup>13</sup>C NMR (CDCl<sub>3</sub>) δ 168.3, 166.7, 148.3, 137.6, 131.0, 130.1, 129.4,

129.2, 128.5, 128.3, 126.9, 126.4, 125.9, 125.7, 124.8, 124.1, 123.5, 122.8, 121.7, 113.9, 76.6, 49.9, 46.3, 26.5, 24.5 ppm; IR (CH<sub>2</sub>Cl<sub>2</sub>) 3281, 1677, 1672 cm<sup>-1</sup>. HPLC (Whelk-01, 10% *i*-PrOH/hexanes, 1.0 mL/min) (R) = 8.84, (S) = 9.34. Anal. Calcd. for C<sub>25</sub>H<sub>22</sub>Cl<sub>2</sub>N<sub>2</sub>O<sub>4</sub> C, 61.87; H, 4.57; N, 5.77. Found C, 61.86; H, 4.55; N, 5.79.

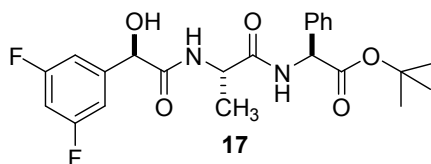

**(S)-tert-butyl-2-((S)-2-((R)-2-(3,5-difluorophenyl)-2-hydroxyacetamido)-propanamido)-2-phenylacetate (17)**<sup>16</sup>: Benzoylquinidine **2a** (0.04 mmol) and *trans*-(PPh<sub>3</sub>)<sub>2</sub>PdCl<sub>2</sub> (0.04 mmol) were placed into a 25 mL round bottom flask equipped with a magnetic stir bar and were dissolved in 3 mL of THF. The flask was cooled to -78 °C and Hünig's base (0.4 mmol) was added to the reaction flask followed by 3,5-(difluoro)phenylacetyl chloride<sup>17</sup> (0.4 mmol), as a solution in 2 mL of THF. *o*-Chloranil **4** (0.4 mmol) as a solution in 2 mL of THF was added via syringe pump for 8 h. The reaction was quenched using **16**<sup>18</sup> (0.4 mmol) in 2 mL of THF and then warmed to rt. Once the reaction was completed by TLC, the reaction was concentrated *in vacuo*. The reaction was diluted with 10 mL of CH<sub>2</sub>Cl<sub>2</sub> and washed 3X with H<sub>2</sub>O in a separatory funnel. The organic layer was dried using MgSO<sub>4</sub> and concentrated *in vacuo*. The residue was then dissolved in 2.6 mL of 4:1 (CH<sub>3</sub>CN/H<sub>2</sub>O) in a round bottom flask equipped with a magnetic stir bar. Cerium ammonium nitrate (0.14 mmol) was added to the reaction at 0° C and stirred overnight. Water was then added and the mixture was extracted 3X with EtOAc. The organic layer was dried with MgSO<sub>4</sub> and concentrated *in vacuo*. The crude product was then columned using 50% EtOAc/hexanes. Clear oil: % yield = 87; % ee = >99; [α]<sub>D</sub> = -21.5° (c = 0.010, CHCl<sub>3</sub>); <sup>1</sup>H NMR (CDCl<sub>3</sub>) δ 7.18-7.42 (m, 6H), 6.60-7.25 (m, 3H), 5.36 (d, 1H), 4.90-5.02 (m, 2H), 4.51-4.58 (m, 1H), 4.31 (bs, 1H), 1.36-1.40 (m, 12H) ppm; <sup>13</sup>C NMR (CDCl<sub>3</sub>) δ 176.3, 167.8, 166.7, 164.2 (doublet),

161.2 (doublet), 136.5 (triplet), 126.4, 125.9, 125.7, 124.8, 124.1, 123.5, 112.6 (doublet), 112.5 (doublet), 103.0 (triplet), 80.6, 79.6, 76.9, 46.3, 26.5, 19.5 ppm; IR (CH<sub>2</sub>Cl<sub>2</sub>) 3430, 3410, 3328, 1747, 1671, 1666 cm<sup>-1</sup>. HPLC (Whelk-01, 1% *i*-PrOH/hexanes, 1.0 mL/min) (R) = 17.73, (S) = 19.38. Anal. Calcd. for C<sub>23</sub>H<sub>26</sub>F<sub>2</sub>N<sub>2</sub>O<sub>5</sub> C, 61.60; H, 5.84; N, 6.25. Found C, 61.68; H, 5.81; N, 6.22.

### Rate of methanolysis forming **6a**.<sup>19</sup>

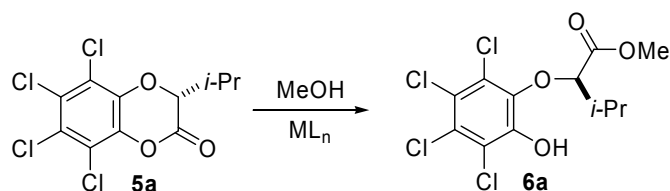

**5a was formed:** Benzoylquinidine **2a** (0.04 mmol) and *trans*-(PPh<sub>3</sub>)<sub>2</sub>PdCl<sub>2</sub> (0.04 mmol) were placed into a 25 mL round bottom flask equipped with a magnetic stir bar and were dissolved in 3 mL of THF. The flask was cooled to -78 °C and Hünig's base (0.4 mmol) was added to the reaction flask followed by isovaleryl chloride (0.4 mmol), as a solution in 2 mL of THF. *o*-Chloranil **4** (0.4 mmol) as a solution in 2 mL of THF was added via syringe pump for 6 h, and the reaction was maintained at -78 °C for an additional 6 h before warming to RT at which time the mixture was diluted with hexanes and filtered through a short plug of silica and washed through with hexanes. Pure **5a** is obtained after subjection to high vacuum.

**Methanolysis:** **5a** (0.3 mmol, purified for accuracy) in 1 mL THF was added in one portion to a 10 mL round bottom flask containing catalysts as indicated below in a rapidly stirring solution of 2 mL THF and 3 mL MeOH. When the reaction was complete (by TLC) the solvent was rapidly evaporated (cold, under high vacuum). The catalysts were removed by dissolving the reaction mixture in CH<sub>2</sub>Cl<sub>2</sub> and filtering through a plug of silica, washing with CH<sub>2</sub>Cl<sub>2</sub>. After removal of the solvent, the pure product was confirmed by <sup>1</sup>H NMR.<sup>15</sup>



|           | <i>trans-</i>                                      |                      |  |    |
|-----------|----------------------------------------------------|----------------------|--|----|
| BQd       | (PPh <sub>3</sub> ) <sub>2</sub> PdCl <sub>2</sub> | Sc(OTf) <sub>3</sub> |  | h  |
| --        | --                                                 | --                   |  | 15 |
| 0.03mmol  | --                                                 | --                   |  | 13 |
| 0.015mmol | 0.015mmol                                          | --                   |  | 12 |
| 0.01mmol  | 0.01mmol                                           | 0.01mmol             |  | 9  |
| 0.015mmol | --                                                 | 0.015mmol            |  | 12 |
| --        | --                                                 | 0.03mmol             |  | 12 |
| --        | 0.015mmol                                          | 0.015mmol            |  | 12 |
| --        | 0.03mmol                                           | --                   |  | 13 |

#### Rate Study with BQd vs. BQd and *trans*-(PPh<sub>3</sub>)<sub>2</sub>PdCl<sub>2</sub>:

25-mL flasks were set up in the following manner: To a suspension of NaH (0.021 g, 0.875 mmol), **2a** (0.035 g, 0.0875 mmol), and 15-crown-5 (0.016 mL, 0.0875 mmol) in THF (8.0 mL) at -78°C was added phenylacetyl chloride **1b** (0.108 mL, 0.875 mmol) in a solution of THF (2.0 mL). The reaction was allowed to stir at -78 °C for 6 h. *o*-Chloranil **4** (0.200 mg, 0.875 mmol) was then added as a solution in 4 mL of THF to each reaction flask and allowed to react for 3, 6, 9, 12, and 15 min. The reactions were quenched at their respective times using 3.0 mL of 1M methanolic HCl. The resulting mixture was subjected to column chromatography using silica gel (1% EtOAc/hexanes). (Reactions performed in duplicate and averaged)

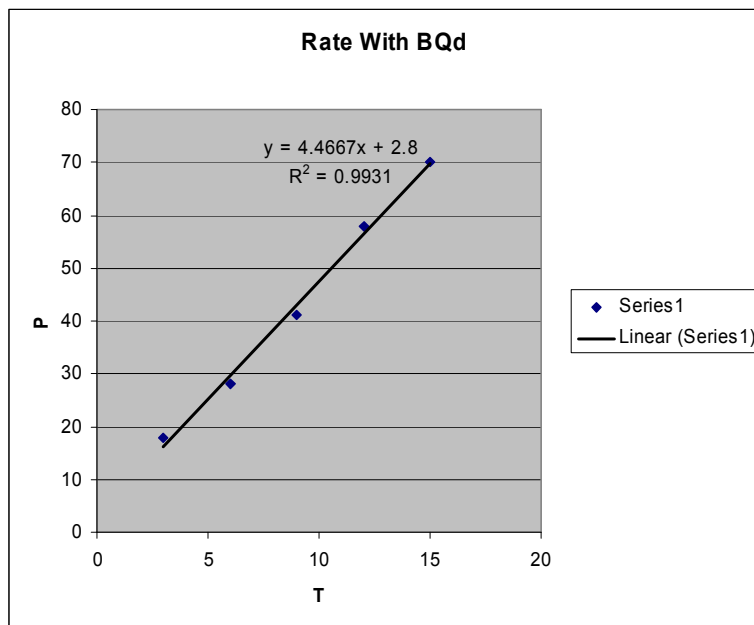

Procedure to determine rate effect of BQd and *trans*-(PPh<sub>3</sub>)<sub>2</sub>PdCl<sub>2</sub> is the same as stated above except with the addition of *trans*-(PPh<sub>3</sub>)<sub>2</sub>PdCl<sub>2</sub> (0.058 g, 0.0875 mmol) before adding phenylacetyl chloride **1b**.

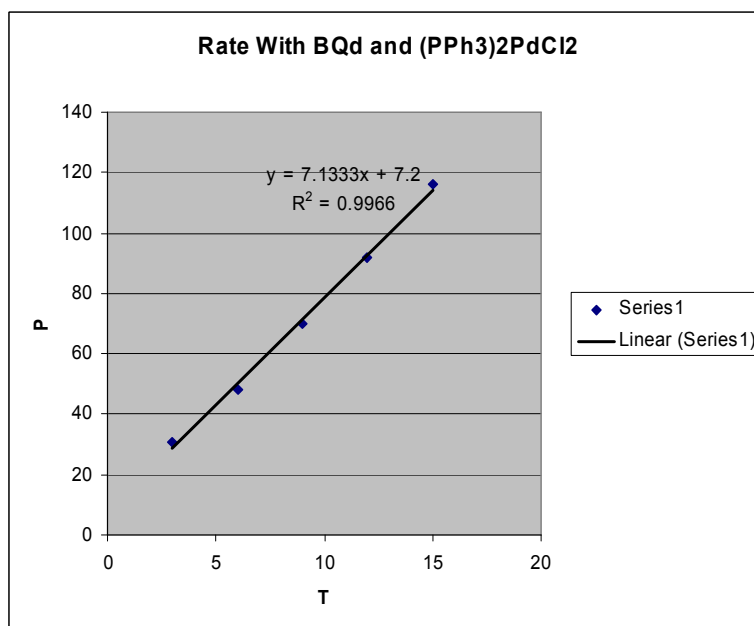

The rate study showed a 1.6 fold increase in rate with BQd and *trans*-(PPh<sub>3</sub>)<sub>2</sub>PdCl<sub>2</sub> vs. BQd.

## UV-Vis Study:

In a Schlenk tube, 0.137 mmol of ethylphenyl ketene was dissolved in 10 mL of THF and cooled to  $-78\text{ }^{\circ}\text{C}$ .  $\lambda = 395\text{ nm}$ ,  $A = 0.102835$  was used to monitor ketene concentration vs. ketene enolate formation. 0.137 mmol of BQd was added to the solution and after 20 min. (absorbance was stabilized)  $A = 0.094842$  at  $\lambda = 395\text{ nm}$ . 0.137 mmol of *trans*-(PPh<sub>3</sub>)<sub>2</sub>PdCl<sub>2</sub> was added to the Schlenk flask and after 20 min. (absorbance was stabilized)  $A = 0.091547$  at  $\lambda = 395\text{ nm}$ .

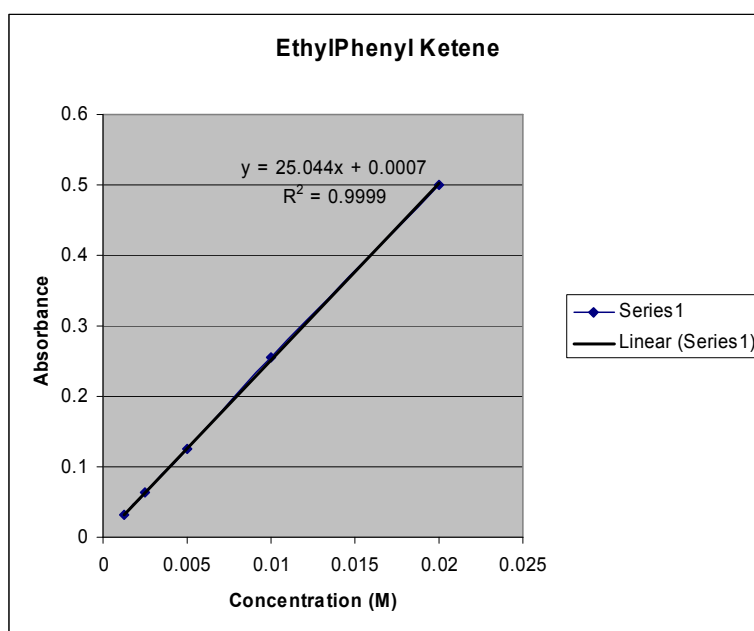

$$e = 125\text{ Lmol}^{-1}\text{cm}^{-1}$$

Initial Ketene Concentration =  $4.10 \times 10^{-3}\text{ M}$

Ketene Concentration with BQd =  $3.76 \times 10^{-3}\text{ M}$

Ketene Concentration with BQd and *trans*-(PPh<sub>3</sub>)<sub>2</sub>PdCl<sub>2</sub> =  $3.63 \times 10^{-3}\text{ M}$

**Figure 2A: *o*-chloranil**

\*\*\*\*\*

Gaussian 03: AM64L-G03RevD.01 13-Oct-2005  
7-Oct-2008

\*\*\*\*\*

```
%rwf=/scratch/tdudding/Quinone-gv
%nosave
%mem=24GB
%NProcShared=4
Will use up to 4 processors via shared memory.
%chk=/scratch/tdudding/Quinone-gv
```

```
-----
#opt=calcfc freq=noraman b3lyp/lanl2dz
-----
```

```
Zero-point correction=          0.045879
(Hartree/Particle)
Thermal correction to Energy=    0.057013
Thermal correction to Enthalpy=   0.057958
Thermal correction to Gibbs Free Energy= 0.006637
Sum of electronic and zero-point Energies= -438.650060
Sum of electronic and thermal Energies= -438.638925
Sum of electronic and thermal Enthalpies= -438.637981
Sum of electronic and thermal Free Energies= -438.689302
C      1.45559900  0.43142400  0.00000400
C     -1.45559200  0.43141500  0.00000300
C      0.77841900  1.75170200  0.00001300
C      0.73936500 -0.73102100  0.00000900
C     -0.73935300 -0.73102700  0.00001100
C     -0.77842600  1.75169700  0.00000700
Cl     -3.24039200  0.46454500 -0.00002600
Cl     -1.58001700 -2.31006800  0.00001200
Cl      1.58003700 -2.31005800  0.00000500
Cl      3.24037400  0.46456100 -0.00002700
O       1.39026400  2.83264100  0.00003000
O     -1.39027800  2.83263400  0.00001200
```

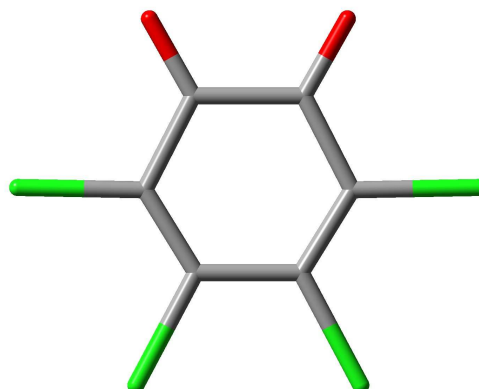

**Figure 2B:** *o*-chloranil-Sc(III) complex

\*\*\*\*\*

Gaussian 03: IA32L-G03RevD.01 13-Oct-2005  
8-Oct-2008

\*\*\*\*\*

%nosave

%mem=2000mb

%nproc=1

Will use up to 1 processors via shared memory.

-----  
# opt=calcfc freq=noraman b3lyp/lanl2dz

geom=connectivity

-----  
Zero-point correction= 0.202047

(Hartree/Particle)

Thermal correction to Energy= 0.249852

Thermal correction to Enthalpy= 0.250797

Thermal correction to Gibbs Free Energy= 0.110478

Sum of electronic and zero-point Energies= -2359.815527

Sum of electronic and thermal Energies= -2359.767722

Sum of electronic and thermal Enthalpies= -2359.766778

Sum of electronic and thermal Free Energies= -2359.907097

|    |             |             |             |   |            |             |             |
|----|-------------|-------------|-------------|---|------------|-------------|-------------|
| Sc | 1.09920700  | 0.54399400  | 0.56725800  | F | 1.18716400 | -3.75654500 | -1.00645800 |
| O  | 4.00622500  | -1.76099700 | -1.35865800 | C | 5.32738100 | 0.86209200  | -1.48019400 |
| O  | 1.21052800  | -1.42068700 | 1.11306200  | F | 5.47538600 | 2.01200800  | -0.73499200 |
| O  | 0.38749400  | 2.38648600  | 0.01628600  | F | 4.67699600 | 1.14623200  | -2.65810000 |
| S  | -0.84868200 | 3.02967100  | -0.92951400 | F | 6.56834600 | 0.32467200  | -1.75154800 |
| O  | -0.37049500 | 3.55167500  | -2.36905800 | O | 4.97335200 | -0.62396700 | 1.01926000  |
| O  | -2.18906600 | 2.09310600  | -0.82244900 | O | 1.64349900 | 1.18505700  | 2.50806000  |
| C  | -1.25418000 | 4.63070100  | 0.21313600  | C | 2.71430100 | 0.50324100  | 3.28376000  |
| F  | -2.36857400 | 5.26798200  | -0.27887300 | H | 3.34395100 | -0.04110800 | 2.57866300  |
| F  | -0.17916200 | 5.48803400  | 0.20749200  | H | 2.24556100 | -0.18239500 | 3.99731200  |
| F  | -1.49915600 | 4.20537000  | 1.50805300  | H | 3.30605300 | 1.26959500  | 3.79546900  |
| S  | 4.26099200  | -0.47498400 | -0.42526100 | C | 0.85045800 | 2.13654200  | 3.31360000  |
| O  | 2.87461500  | 0.49437100  | -0.26720900 | H | 1.52411000 | 2.90330500  | 3.71088100  |
| O  | -0.22011100 | -0.20198500 | -1.04739200 | H | 0.35331400 | 1.59145900  | 4.12337200  |
| O  | -1.03298700 | 0.34072400  | 1.39430100  | H | 0.11354300 | 2.58551900  | 2.64923600  |
| C  | -1.91714700 | -0.09512200 | 0.60970500  |   |            |             |             |
| C  | -3.69944100 | -1.11573400 | -1.38725700 |   |            |             |             |
| C  | -1.43881500 | -0.42866900 | -0.81518800 |   |            |             |             |
| C  | -3.31951300 | -0.28047900 | 0.93200200  |   |            |             |             |
| C  | -4.16748300 | -0.76912100 | -0.02560700 |   |            |             |             |
| C  | -2.39378200 | -0.95658900 | -1.77092300 |   |            |             |             |
| Cl | -3.83422500 | 0.14170000  | 2.58131300  |   |            |             |             |
| Cl | -5.88974900 | -1.00513900 | 0.35515700  |   |            |             |             |
| Cl | -4.88886100 | -1.75557300 | -2.54511400 |   |            |             |             |
| Cl | -1.78542100 | -1.35129400 | -3.39113700 |   |            |             |             |
| S  | 0.21839600  | -2.74783100 | 1.38683300  |   |            |             |             |
| O  | 0.19065600  | -3.19857100 | 2.92885100  |   |            |             |             |
| O  | -1.21071600 | -2.56434600 | 0.59624600  |   |            |             |             |
| C  | 1.23130000  | -4.11813400 | 0.31618600  |   |            |             |             |
| F  | 0.61585300  | -5.33898300 | 0.49168600  |   |            |             |             |
| F  | 2.52389600  | -4.17366100 | 0.76610800  |   |            |             |             |

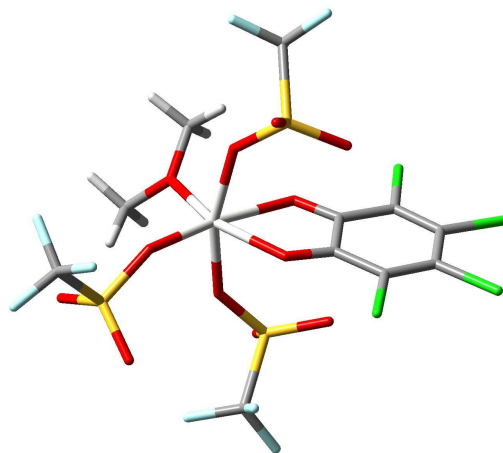

**Figure 2C:** *o*-chloranil-*trans*-(Ph<sub>3</sub>P)<sub>2</sub>PdCl<sub>2</sub>

```
*****
Gaussian 03: IA32L-G03RevD.01 13-Oct-2005
      8-Oct-2008
*****
%nosave
%mem=2000mb
%nproc=1
Will use up to 1 processors via shared memory.
-----
# opt=calcfc freq=noraman b3lyp/lanl2dz
-----
Zero-point correction=          0.103809
(Hartree/Particle)
Thermal correction to Energy=    0.126793
Thermal correction to Enthalpy=   0.127737
Thermal correction to Gibbs Free Energy=  0.048010
Sum of electronic and zero-point Energies= -611.879804
Sum of electronic and thermal Energies= -611.856820
Sum of electronic and thermal Enthalpies= -611.855876
Sum of electronic and thermal Free Energies= -611.935603
C      -1.97188400  1.40738800 -0.00005900
C      -1.97181900 -1.40736900  0.00006900
C      -0.75541000  0.70830700 -0.00000600
C      -3.19373500  0.70444700 -0.00003900
C      -3.19370100 -0.70448200  0.00003200
C      -0.75537200 -0.70823500  0.00003200
Cl     -1.90845300 -3.20517700  0.00014600
Cl     -4.74660000 -1.61529600  0.00006700
Cl     -4.74667100  1.61519600 -0.00009800
Cl     -1.90859400  3.20519700 -0.00013500
O       0.46651600  1.36896700  0.00002700
O       0.46657700 -1.36883900  0.00001400
Pd      1.97751200  0.00007200  0.00000300
Cl      3.66010300  1.72814100 -0.00000800
P       2.06425700  0.00012700  2.40311400
H       1.44017300  1.12444800  3.00928600
H       3.38279000  0.00016600  2.92504700
H       1.44028200 -1.12421800  3.00936700
P       2.06428000 -0.00031900 -2.40310200
H       3.38282400  0.00101700 -2.92499200
H       1.43898000  1.12311800 -3.00966700
H       1.44155800 -1.12555300 -3.00898700
Cl      3.66001400 -1.72810800 -0.00002300
```

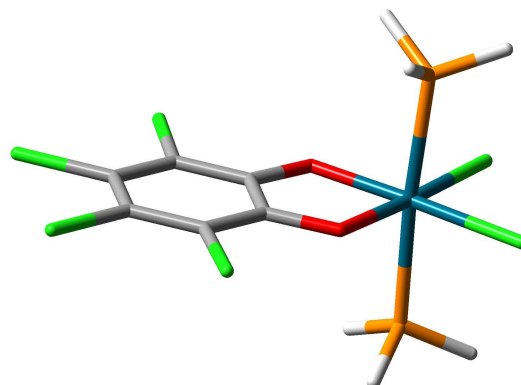

**Figure 2D:** *o*-chloranil-*trans*-Ph<sub>3</sub>PPdCl<sub>2</sub> square planar

\*\*\*\*\*

Gaussian 03: IA32L-G03RevD.01 13-Oct-2005  
10-Oct-2008

\*\*\*\*\*

%nosave  
%mem=2000mb  
%nproc=1  
Will use up to 1 processors via shared memory.

-----  
# opt=calcfc freq=noraman b3lyp/lanl2dz  
-----

Zero-point correction= 0.076762  
(Hartree/Particle)  
Thermal correction to Energy= 0.096949  
Thermal correction to Enthalpy= 0.097893  
Thermal correction to Gibbs Free Energy= 0.022472  
Sum of electronic and zero-point Energies= -603.636052  
Sum of electronic and thermal Energies= -603.615865  
Sum of electronic and thermal Enthalpies= -603.614921  
Sum of electronic and thermal Free Energies= -603.690342

|    |             |             |             |
|----|-------------|-------------|-------------|
| C  | 2.12101900  | -1.44623600 | -0.37613100 |
| C  | 1.75124000  | 1.42221700  | -0.03045300 |
| C  | 0.75112000  | -0.90645300 | -0.51474500 |
| C  | 3.17722900  | -0.61730600 | -0.12210400 |
| C  | 2.99127300  | 0.83950000  | 0.03028800  |
| C  | 0.56087200  | 0.59847900  | -0.22941000 |
| Cl | 1.49299900  | 3.17460900  | 0.17142600  |
| Cl | 4.43516500  | 1.84602000  | 0.31456800  |
| Cl | 4.83154900  | -1.27777800 | 0.02205800  |
| Cl | 2.29792000  | -3.20490600 | -0.58880500 |
| O  | -0.22495900 | -1.58176700 | -0.88566400 |
| O  | -0.59581400 | 1.08643000  | -0.18915400 |
| P  | -4.55969000 | -0.76056500 | 0.51523300  |
| H  | -4.70710400 | -1.46399800 | 1.74211700  |
| H  | -5.01636900 | -1.70347000 | -0.44624100 |
| H  | -5.63252600 | 0.17184200  | 0.55330600  |
| Cl | -3.47046700 | 0.95692800  | -1.93241000 |
| Pd | -2.46427500 | 0.13741200  | 0.08750100  |
| Cl | -1.61318400 | -0.74754200 | 2.15734800  |

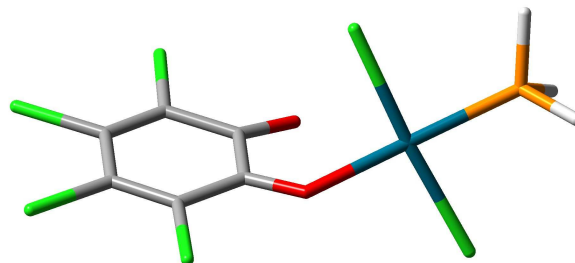

**Figure 4A: Pd(II)-enolate-*trans*-Ph<sub>3</sub>**

\*\*\*\*\*

Gaussian 03: IA32L-G03RevD.01 13-Oct-2005  
9-Oct-2008

\*\*\*\*\*

%nosave

%mem=2000mb

%nproc=1

Will use up to 1 processors via shared memory.

-----  
# opt=calcfc freq=noraman b3lyp/lanl2dz  
-----

Zero-point correction= 0.265674  
(Hartree/Particle)  
Thermal correction to Energy= 0.284270  
Thermal correction to Enthalpy= 0.285214  
Thermal correction to Gibbs Free Energy= 0.215825  
Sum of electronic and zero-point Energies= -646.611432  
Sum of electronic and thermal Energies= -646.592837  
Sum of electronic and thermal Enthalpies= -646.591893  
Sum of electronic and thermal Free Energies= -646.661282

|    |             |             |             |
|----|-------------|-------------|-------------|
| N  | 2.22619900  | 0.56286500  | 0.06715500  |
| C  | 2.20447500  | -0.26516700 | -1.23195900 |
| C  | 2.38341400  | -0.39850300 | 1.25798100  |
| C  | 3.42139900  | 1.51353800  | 0.01344100  |
| H  | 2.47266500  | 0.22904700  | 2.14867700  |
| H  | 1.45270900  | -0.96833600 | 1.31651600  |
| H  | 3.30195300  | 2.10235000  | -0.90031000 |
| H  | 3.34705800  | 2.19483800  | 0.86074600  |
| H  | 1.38683500  | -0.97816500 | -1.12434200 |
| H  | 1.93890900  | 0.42208000  | -2.03702600 |
| C  | 3.62310600  | -1.31300800 | 1.04463900  |
| H  | 3.30011200  | -2.34488300 | 0.86480900  |
| H  | 4.24155200  | -1.31552200 | 1.95051200  |
| C  | 3.58205300  | -0.95076900 | -1.44269400 |
| H  | 4.10698700  | -0.50909600 | -2.29941000 |
| H  | 3.42483500  | -2.01144900 | -1.66973700 |
| C  | 4.75137400  | 0.70441100  | 0.03834800  |
| H  | 5.41696800  | 1.06659800  | -0.75410000 |
| H  | 5.27154200  | 0.85468400  | 0.99268800  |
| C  | 4.44034800  | -0.79791400 | -0.16526600 |
| H  | 5.37256700  | -1.36570300 | -0.26155900 |
| C  | 0.83886100  | 1.34210800  | 0.21593200  |
| O  | -0.05283700 | 0.91192500  | -0.63924400 |
| C  | 0.76273700  | 2.31718500  | 1.15386000  |
| H  | -0.18100400 | 2.84084600  | 1.25887700  |
| H  | 1.57264500  | 2.59428700  | 1.81709900  |
| Pd | -1.80927600 | -0.06368700 | -0.14470100 |
| Cl | -0.61769900 | -2.16762200 | 0.15752400  |
| P  | -3.85979400 | -1.10346900 | 0.30802800  |
| H  | -4.88813900 | -0.93269200 | -0.66402400 |
| H  | -3.86937800 | -2.51811200 | 0.48758200  |
| H  | -4.53368900 | -0.66758500 | 1.48604600  |
| Cl | -3.10105400 | 1.97007600  | -0.28099800 |

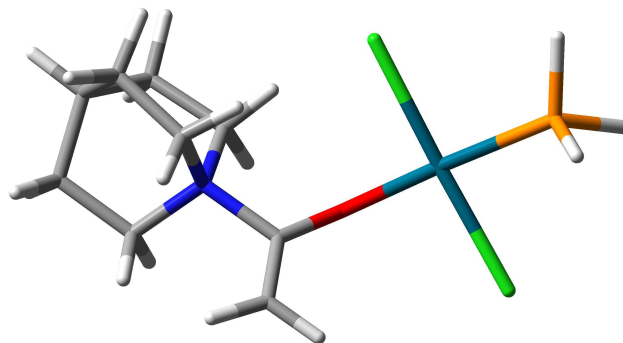



Figure 4B: Pd(II)-enolate-*cis*-Ph<sub>3</sub>

\*\*\*\*\*

Gaussian 03: IA32L-G03RevD.01 13-Oct-2005  
8-Oct-2008

\*\*\*\*\*

%nosave

%mem=2000mb

%nproc=1

Will use up to 1 processors via shared memory.

-----  
# opt=calcfc freq=noraman b3lyp/lanl2dz  
-----

Zero-point correction= 0.265477 (Hartree/Particle)

Thermal correction to Energy= 0.283964

Thermal correction to Enthalpy= 0.284909

Thermal correction to Gibbs Free Energy= 0.216764

Sum of electronic and zero-point Energies= -646.604516

Sum of electronic and thermal Energies= -646.586028

Sum of electronic and thermal Enthalpies= -646.585084

Sum of electronic and thermal Free Energies= -646.653229

|    |             |             |             |
|----|-------------|-------------|-------------|
| N  | 2.20370700  | 0.48355000  | 0.20380200  |
| C  | 1.91534600  | -0.11292200 | -1.18666900 |
| C  | 2.67912300  | -0.64910600 | 1.13190900  |
| C  | 3.32144500  | 1.52201800  | 0.06221100  |
| H  | 2.99570900  | -0.17624700 | 2.06453500  |
| H  | 1.80205900  | -1.27034000 | 1.32715400  |
| H  | 2.98328500  | 2.23047800  | -0.69995800 |
| H  | 3.39403900  | 2.05779300  | 1.00960800  |
| H  | 1.20102700  | -0.92187100 | -1.02177700 |
| H  | 1.41268800  | 0.66325900  | -1.76402300 |
| C  | 3.83704500  | -1.43327100 | 0.45496600  |
| H  | 3.48422000  | -2.41955600 | 0.13169000  |
| H  | 4.64301300  | -1.59596700 | 1.18076400  |
| C  | 3.23979000  | -0.59807800 | -1.83556000 |
| H  | 3.53399800  | 0.06231800  | -2.66163300 |
| H  | 3.08509400  | -1.59721900 | -2.25857800 |
| C  | 4.65557200  | 0.82067100  | -0.32411900 |
| H  | 5.13970500  | 1.37537900  | -1.13658100 |
| H  | 5.34800900  | 0.82042700  | 0.52702300  |
| C  | 4.35604400  | -0.63355500 | -0.76527900 |
| H  | 5.26117400  | -1.09939500 | -1.17022800 |
| C  | 0.88594100  | 1.16283300  | 0.78926400  |
| O  | -0.11732700 | 1.17744300  | -0.05742800 |
| C  | 0.97778000  | 1.69257300  | 2.03224600  |
| H  | 0.09643200  | 2.14964800  | 2.46734100  |
| H  | 1.87075300  | 1.65181400  | 2.64369400  |
| Pd | -1.81306000 | -0.07041800 | -0.01401200 |
| Cl | -0.50913800 | -2.02295700 | 0.54536200  |
| Cl | -3.86498700 | -1.28185500 | -0.09935300 |
| P  | -3.16898100 | 1.80668600  | -0.56919800 |
| H  | -2.52267900 | 3.06957300  | -0.75295400 |
| H  | -3.93859200 | 1.72447500  | -1.76718800 |
| H  | -4.19021000 | 2.16480500  | 0.36044900  |

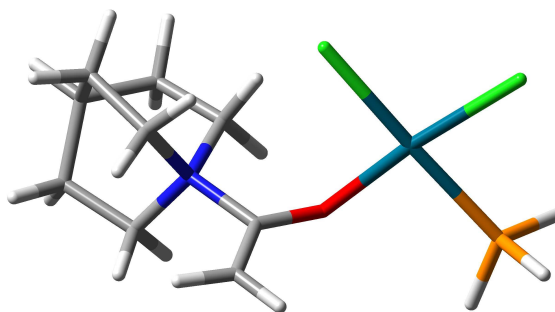

**Figure 5A: Pd(II)-enolate-Z-Ph**

\*\*\*\*\*  
 Gaussian 03: IA32L-G03RevD.01 13-Oct-2005  
 14-Oct-2008  
 \*\*\*\*\*

%nosave  
 %mem=2000mb  
 %nproc=2  
 Will use up to 2 processors via shared memory.

-----  
 # opt=calcfc freq=noraman b3lyp/lanl2dz  
 -----

Zero-point correction= 0.347932  
 (Hartree/Particle)  
 Thermal correction to Energy= 0.371011  
 Thermal correction to Enthalpy= 0.371955  
 Thermal correction to Gibbs Free Energy= 0.292949  
 Sum of electronic and zero-point Energies= -877.555109  
 Sum of electronic and thermal Energies= -877.532029  
 Sum of electronic and thermal Enthalpies= -877.531085  
 Sum of electronic and thermal Free Energies= -877.610092

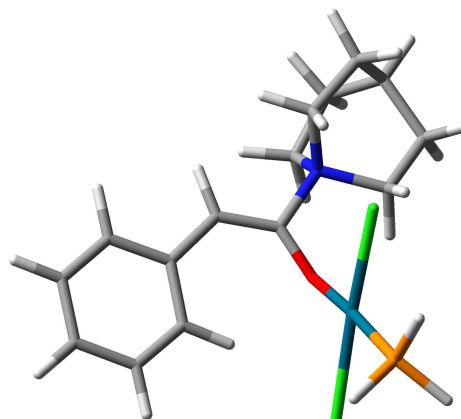

|    |             |             |             |   |             |            |             |
|----|-------------|-------------|-------------|---|-------------|------------|-------------|
| N  | 2.38201600  | 0.37963400  | -0.25017600 | C | -0.77740900 | 4.03764200 | 0.88330500  |
| C  | 2.49428200  | -1.06378000 | -0.77197300 | C | -1.85350900 | 2.31038100 | -0.46170400 |
| C  | 2.90977400  | 0.41174200  | 1.19270600  | C | -1.97941700 | 4.75951000 | 0.93275500  |
| C  | 3.25452000  | 1.27794800  | -1.13436900 | H | 0.10502200  | 4.42950200 | 1.38851100  |
| H  | 2.93255900  | 1.45987300  | 1.49953300  | C | -3.05399600 | 3.03881800 | -0.40974700 |
| H  | 2.17037700  | -0.11630500 | 1.79879900  | H | -1.81555000 | 1.38120200 | -1.01760700 |
| H  | 2.91607200  | 1.11080700  | -2.16111900 | C | -3.12905900 | 4.26162800 | 0.28585200  |
| H  | 3.03091300  | 2.31343800  | -0.87432600 | H | -2.02227200 | 5.70407100 | 1.47103800  |
| H  | 1.95842400  | -1.68433500 | -0.05204600 | H | -3.93098100 | 2.64639300 | -0.91917600 |
| H  | 1.94741100  | -1.10115400 | -1.71410700 | H | -4.06273200 | 4.81843600 | 0.32120400  |
| C  | 4.32148400  | -0.23709900 | 1.25610400  |   |             |            |             |
| H  | 4.26860100  | -1.20901300 | 1.76097100  |   |             |            |             |
| H  | 4.99235700  | 0.40014800  | 1.84495400  |   |             |            |             |
| C  | 3.98909200  | -1.45870100 | -0.91295800 |   |             |            |             |
| H  | 4.27738200  | -1.51399400 | -1.97043800 |   |             |            |             |
| H  | 4.13909100  | -2.45624200 | -0.48385100 |   |             |            |             |
| C  | 4.75747700  | 0.92947800  | -0.93487900 |   |             |            |             |
| H  | 5.25156300  | 0.86471900  | -1.91149200 |   |             |            |             |
| H  | 5.26234000  | 1.72123800  | -0.36715600 |   |             |            |             |
| C  | 4.86924800  | -0.41875200 | -0.18062300 |   |             |            |             |
| H  | 5.91291900  | -0.75084900 | -0.15126300 |   |             |            |             |
| C  | 0.85280200  | 0.85722200  | -0.32028500 |   |             |            |             |
| O  | 0.07191300  | 0.00158000  | -0.91942500 |   |             |            |             |
| C  | 0.60411600  | 2.10544100  | 0.17678900  |   |             |            |             |
| H  | 1.42588200  | 2.65729500  | 0.62680900  |   |             |            |             |
| Pd | -1.26120400 | -1.36496300 | -0.05156900 |   |             |            |             |
| Cl | 0.14861900  | -1.78081800 | 1.88712200  |   |             |            |             |
| P  | -2.85839400 | -2.88097600 | 0.75459100  |   |             |            |             |
| H  | -3.18218600 | -3.98431600 | -0.08798500 |   |             |            |             |
| H  | -2.58689200 | -3.53659400 | 1.99132000  |   |             |            |             |
| H  | -4.15535100 | -2.34257200 | 0.99853400  |   |             |            |             |
| Cl | -2.77301500 | -1.10963700 | -1.92172200 |   |             |            |             |
| C  | -0.68912800 | 2.79833400  | 0.19186900  |   |             |            |             |

**Figure 5B: Pd(II)-enolate-*E*-Ph**

\*\*\*\*\*  
 Gaussian 03: IA32L-G03RevD.01 13-Oct-2005  
 9-Oct-2008  
 \*\*\*\*\*

%nosave  
 %mem=2000mb  
 %nproc=1  
 Will use up to 1 processors via shared memory.

-----  
 # opt=calcfc freq=noraman b3lyp/lanl2dz  
 -----

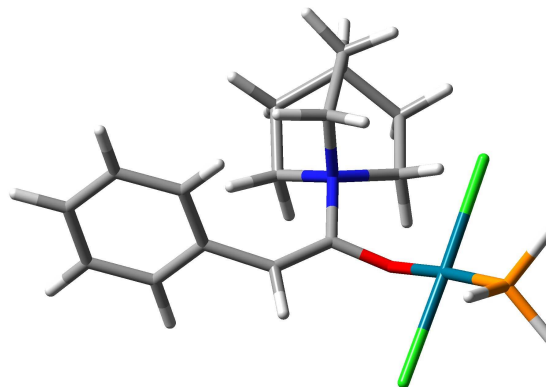

Zero-point correction= 0.347484  
 (Hartree/Particle)  
 Thermal correction to Energy= 0.370698  
 Thermal correction to Enthalpy= 0.371642  
 Thermal correction to Gibbs Free Energy= 0.290922  
 Sum of electronic and zero-point Energies= -877.540505  
 Sum of electronic and thermal Energies= -877.517291  
 Sum of electronic and thermal Enthalpies= -877.516347  
 Sum of electronic and thermal Free Energies= -877.597067

|            |             |            |             |    |             |             |             |
|------------|-------------|------------|-------------|----|-------------|-------------|-------------|
| N          | -1.38713900 | 1.17261500 | -           | C  | -0.53312500 | -0.14166400 | -0.70431000 |
| 0.45305000 |             |            |             | O  | 0.66840300  | 0.16127800  | -1.14932500 |
| C          | -0.67934400 | 2.36104100 | -1.14637400 | C  | -1.04339700 | -1.39507100 | -0.53692600 |
| C          | -1.44489300 | 1.47157200 | 1.05755900  | Pd | 2.42965900  | -0.18979900 | -0.12768100 |
| C          | -2.80750700 | 1.08238200 | -1.01849400 | Cl | 2.17011200  | 1.87205600  | 1.14751800  |
| H          | -2.06926500 | 0.69363000 | 1.49809700  | P  | 4.48610600  | -0.63146900 | 0.91291300  |
| H          | -0.42161500 | 1.37998900 | 1.43002300  | H  | 5.60407600  | -0.84314400 | 0.05370000  |
| H          | -2.69518100 | 1.04619300 | -2.10613400 | H  | 5.00625200  | 0.34068000  | 1.81760000  |
| H          | -3.24713300 | 0.14340800 | -0.69059300 | H  | 4.54138300  | -1.81167100 | 1.71064200  |
| H          | 0.27854200  | 2.48046000 | -0.64040000 | Cl | 2.73648500  | -2.32816400 | -1.21035800 |
| H          | -0.47463800 | 2.05055400 | -2.17191000 | H  | -0.32216100 | -2.15739700 | -0.83559400 |
| C          | -2.02862300 | 2.89112200 | 1.29697800  | C  | -2.33239900 | -1.91870200 | 0.00149400  |
| H          | -1.23371400 | 3.57856700 | 1.60919900  | C  | -3.22852800 | -2.60055800 | -0.86033400 |
| H          | -2.76587700 | 2.84993700 | 2.10797900  | C  | -2.65034700 | -1.86787200 | 1.38127900  |
| C          | -1.57305800 | 3.62672200 | -1.05755800 | C  | -4.41508200 | -3.17423700 | -0.36986200 |
| H          | -2.01976100 | 3.85878100 | -2.03305800 | H  | -2.98497000 | -2.67768200 | -1.91779700 |
| H          | -0.94903700 | 4.48225000 | -0.77425300 | C  | -3.83843900 | -2.44057500 | 1.87529700  |
| C          | -3.64221700 | 2.30642300 | -0.54640900 | H  | -1.94011900 | -1.42230400 | 2.07386800  |
| H          | -4.23202000 | 2.69032100 | -1.38734600 | C  | -4.73062800 | -3.08940000 | 1.00108000  |
| H          | -4.34974000 | 2.00612900 | 0.23664200  | H  | -5.08720400 | -3.69016200 | -1.05201600 |
| C          | -2.68659000 | 3.39926900 | -0.00906100 | H  | -4.05586800 | -2.39539200 | 2.94023400  |
| H          | -3.23636000 | 4.32857800 | 0.17674100  | H  | -5.64582500 | -3.53634200 | 1.38209200  |

## Enolate-Sc(III) Complex

\*\*\*\*\*

Gaussian 03: IA32L-G03RevD.01 13-Oct-2005

16-Oct-2008

\*\*\*\*\*

%nosave

%mem=2000mb

%nproc=2

Will use up to 2 processors via shared memory.

-----  
# opt=calcfreq=noraman b3lyp/lanl2dz

geom=connectivity

-----  
Zero-point correction= 0.241176  
(Hartree/Particle)  
Thermal correction to Energy= 0.258048  
Thermal correction to Enthalpy= 0.258992  
Thermal correction to Gibbs Free Energy= 0.193555  
Sum of electronic and zero-point Energies= -573.256283  
Sum of electronic and thermal Energies= -573.239411  
Sum of electronic and thermal Enthalpies= -573.238467  
Sum of electronic and thermal Free Energies= -573.303904

|    |             |             |             |
|----|-------------|-------------|-------------|
| N  | -1.79354600 | 0.69783400  | -0.02796700 |
| C  | -1.70326600 | -0.18291700 | 1.24637900  |
| C  | -1.73959700 | -0.20569000 | -1.28615600 |
| C  | -3.13879200 | 1.42591800  | -0.01996100 |
| H  | -1.93133700 | 0.46112900  | -2.13253500 |
| H  | -0.72198100 | -0.58722600 | -1.37162000 |
| H  | -3.18656700 | 1.99129700  | 0.91425800  |
| H  | -3.13089900 | 2.12882700  | -0.85589200 |
| H  | -0.76447600 | -0.73293600 | 1.18453200  |
| H  | -1.62945200 | 0.51117700  | 2.08830100  |
| C  | -2.79036000 | -1.34085500 | -1.16478300 |
| H  | -2.28780200 | -2.30156800 | -1.00718100 |
| H  | -3.35292400 | -1.41820300 | -2.10209400 |
| C  | -2.94050600 | -1.11605100 | 1.33784500  |
| H  | -3.57701500 | -0.82761500 | 2.18302000  |
| H  | -2.60400300 | -2.14234300 | 1.51905200  |
| C  | -4.29977700 | 0.39703500  | -0.14308400 |
| H  | -5.05129500 | 0.60236400  | 0.62766500  |
| H  | -4.79457900 | 0.50027000  | -1.11591300 |
| C  | -3.74283400 | -1.03810100 | 0.01707500  |
| H  | -4.56592000 | -1.75985700 | 0.03420800  |
| C  | -0.57519300 | 1.64071300  | -0.04310600 |
| O  | 0.55169200  | 0.94400500  | -0.06042400 |
| C  | -0.70719200 | 2.98281000  | -0.02758300 |
| H  | 0.19740200  | 3.58082300  | -0.03193700 |
| H  | -1.65360100 | 3.50341600  | -0.00638300 |
| Cl | 1.77672500  | -1.61672000 | -1.79123800 |
| Cl | 4.08525500  | 1.19949200  | -0.16710000 |
| Sc | 2.16276300  | -0.11912200 | -0.00221400 |
| Cl | 1.87936200  | -1.27818700 | 2.03471600  |

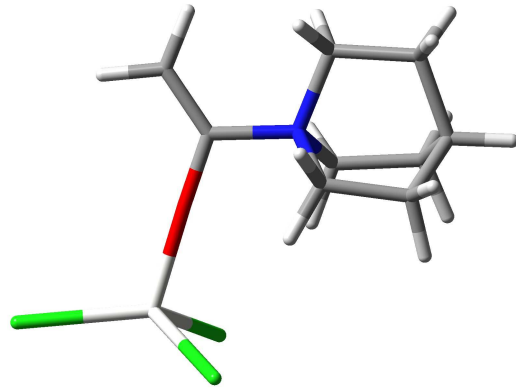

## Ketene

\*\*\*\*\*  
Gaussian 03: IA32L-G03RevD.01 13-Oct-2005  
16-Oct-2008  
\*\*\*\*\*

%nosave  
%mem=2000mb  
%nproc=2  
Will use up to 2 processors via shared memory.

-----  
# opt=calcfc freq=noraman b3lyp/lanl2dz  
-----

Zero-point correction= 0.031749  
(Hartree/Particle)  
Thermal correction to Energy= 0.035222  
Thermal correction to Enthalpy= 0.036166  
Thermal correction to Gibbs Free Energy= 0.008136  
Sum of electronic and zero-point Energies= -152.541492  
Sum of electronic and thermal Energies= -152.538019  
Sum of electronic and thermal Enthalpies= -152.537075  
Sum of electronic and thermal Free Energies= -152.565104  
C 0.00000400 -1.22810300 0.00000000  
H -0.93663800 -1.77455200 0.00000000  
H 0.93665100 -1.77454100 0.00000000  
C 0.00000000 0.09539400 0.00000000  
O -0.00000400 1.29316800 0.00000000

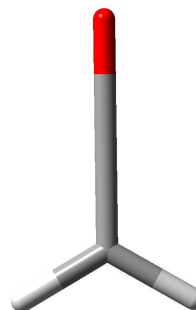

## Phosphine

\*\*\*\*\*  
Gaussian 03: IA32L-G03RevD.01 13-Oct-2005  
16-Oct-2008  
\*\*\*\*\*

%nosave  
%mem=2000mb  
%nproc=2  
Will use up to 2 processors via shared memory.

-----  
# opt=calcfc freq=noraman b3lyp/lanl2dz  
-----

Zero-point correction= 0.023288 (Hartree/Particle)  
Thermal correction to Energy= 0.026193  
Thermal correction to Enthalpy= 0.027137  
Thermal correction to Gibbs Free Energy= 0.003234  
Sum of electronic and zero-point Energies= -8.246579  
Sum of electronic and thermal Energies= -8.243674  
Sum of electronic and thermal Enthalpies= -8.242729  
Sum of electronic and thermal Free Energies= -8.266633  
P 0.00000000 0.00000000 0.12903200  
H 0.00000000 1.22363800 -0.64515800  
H 1.05970200 -0.61181900 -0.64515800  
H -1.05970200 -0.61181900 -0.64515800

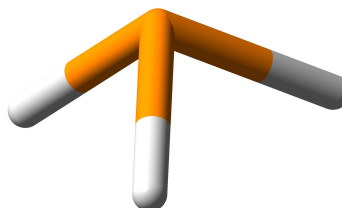

## Quinuclidine

\*\*\*\*\*

Gaussian 03: IA32L-G03RevD.01 13-Oct-2005  
16-Oct-2008

\*\*\*\*\*

%nosave

%mem=2000mb

%nproc=2

Will use up to 2 processors via shared memory.

-----  
# opt=calcfc freq=noraman b3lyp/lanl2dz  
-----

Zero-point correction= 0.195826  
(Hartree/Particle)  
Thermal correction to Energy= 0.202390  
Thermal correction to Enthalpy= 0.203334  
Thermal correction to Gibbs Free Energy= 0.165264  
Sum of electronic and zero-point Energies= -329.055242  
Sum of electronic and thermal Energies= -329.048678  
Sum of electronic and thermal Enthalpies= -329.047734  
Sum of electronic and thermal Free Energies= -329.085804

|   |             |             |             |
|---|-------------|-------------|-------------|
| N | -1.29824700 | 0.00737500  | -0.00177300 |
| C | -0.80808100 | -0.31327700 | 1.36936500  |
| C | -0.79612000 | 1.34984400  | -0.41190500 |
| C | -0.80835800 | -1.02423700 | -0.96108500 |
| H | -1.20408300 | 1.57349300  | -1.40518500 |
| H | -1.20670600 | 2.09118300  | 0.28454100  |
| H | -1.22492900 | -1.99241700 | -0.65738400 |
| H | -1.21906500 | -0.78743300 | -1.95023400 |
| H | -1.21670700 | 0.43635400  | 2.05803000  |
| H | -1.22640200 | -1.28513100 | 1.65862900  |
| C | 0.77595500  | 1.39246800  | -0.42277600 |
| H | 1.15312000  | 2.15773600  | 0.26983000  |
| H | 1.15497300  | 1.64583500  | -1.42258900 |
| C | 0.76384300  | -0.33490800 | 1.42250800  |
| H | 1.13244000  | -1.31959700 | 1.74207200  |
| H | 1.14280200  | 0.40217100  | 2.14409300  |
| C | 0.76361000  | -1.06973200 | -0.99635600 |
| H | 1.13384800  | -2.06588800 | -0.71658800 |
| H | 1.13998800  | -0.85664700 | -2.00661900 |
| C | 1.29797200  | -0.00661300 | 0.00194800  |
| H | 2.39552900  | -0.01255600 | 0.00362700  |

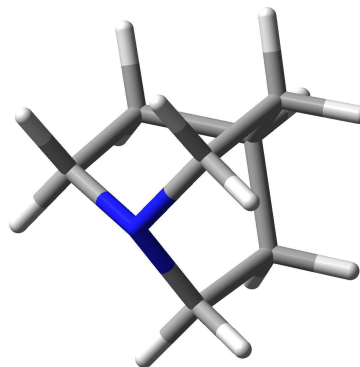

## *trans*-(Ph<sub>3</sub>)<sub>2</sub>PdCl<sub>2</sub>

\*\*\*\*\*

Gaussian 03: IA32L-G03RevD.01 13-Oct-2005  
16-Oct-2008

\*\*\*\*\*

%nosave

%mem=2000mb

%nproc=2

Will use up to 2 processors via shared memory.

-----  
# opt=calcfc freq=noraman b3lyp/lanl2dz  
-----

Zero-point correction= 0.055935  
(Hartree/Particle)  
Thermal correction to Energy= 0.066926  
Thermal correction to Enthalpy= 0.067870  
Thermal correction to Gibbs Free Energy= 0.016476  
Sum of electronic and zero-point Energies= -173.248526  
Sum of electronic and thermal Energies= -173.237535  
Sum of electronic and thermal Enthalpies= -173.236591  
Sum of electronic and thermal Free Energies= -173.287985

|    |             |             |             |
|----|-------------|-------------|-------------|
| Pd | 0.00000000  | -0.00000200 | -0.00014100 |
| P  | -2.29324100 | 0.65684200  | 0.00011100  |
| H  | -3.07821700 | 0.19433400  | -1.09608700 |
| H  | -3.07696200 | 0.19722000  | 1.09844200  |
| H  | -2.59290100 | 2.05014300  | -0.00149100 |
| P  | 2.29324300  | -0.65683700 | 0.00009300  |
| H  | 2.59290900  | -2.05013400 | -0.00293300 |
| H  | 3.07873700  | -0.19303200 | -1.09519000 |
| H  | 3.07644100  | -0.19851000 | 1.09933400  |
| Cl | -0.74973600 | -2.28435300 | 0.00003900  |
| Cl | 0.74973400  | 2.28435200  | 0.00004000  |

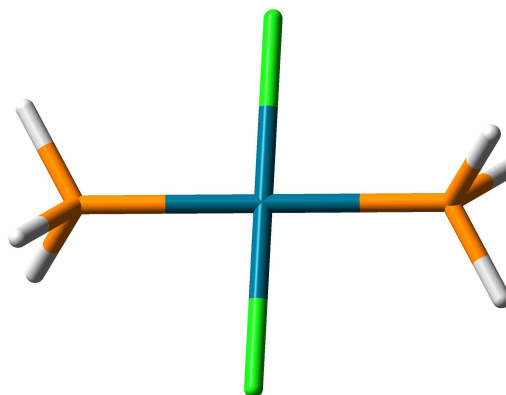

## References:

<sup>1</sup> Pracejus, H.; Maetje, H. *J. Prakt. Chem.* **1964**, *24*, 195.

<sup>2</sup> Ferraris, D.; Young, B.; Cox, C.; Dudding, T.; Drury, W. J., III; Ryzhkov, L.; Taggi, A. E.; Lectka, T. *J. Am. Chem. Soc.* **2002**, *124*, 67-77.

<sup>3</sup> Mase, T.; Houpis, I. N.; Akao, A.; Dorziotis, I.; Emerson, K.; Hoang, T.; Iida, T.; Itoh, T.; Kamei, K.; Kato, S.; Kato, Y.; Kawasaki, M.; Lang, F.; Lee, J.; Lynch, J.; Maligres, P.; Molina, A.; Nemoto, T.; Okada, S.; Reamer, R.; Song, J. Z.; Tschaen, D.; Wada, T.; Zewge, D.; Volante, R. P.; Reider, P. J.; Tomomoto, K. *J. Org. Chem.* **2001**, *66*, 6775-6787.

- 
- <sup>4</sup> Prasad, C. V. C.; Zheng, M.; Vig, S.; Bergstrom, C.; Smith, D.; Gao, Q.; Yeola, S.; Polson, C.; Corsa, J. A.; Guss, V. L.; Loo, A.; Wang, J.; Slecicka, B. G.; Dangler, C.; Robertson, B. J.; Hendrick, J. P.; Roberts, S. B.; Barten, D. M. *Bioorg. Med. Chem. Lett.* **2007**, *17*, 4006-4011..
- <sup>5</sup> Wood, M. R.; Schirripa, K. M.; Kim, J. J.; Kuduk, S. D.; Chang, R. K.; Di Marco, C. N.; DiPardo, R. M.; Wan, B. L.; Murphy, K. L.; Ransom, R. W.; Chang, R. S. L.; Holahan, M. A.; Cook, J. J.; Lemarie, W.; Mosser, S. D.; Bednar, R. A.; Tang, C.; Prueksaritanont, T.; Wallace, A. A.; Mei, Q.; Yu, J.; Bohn, D. L.; Clayton, F. C.; Adarayn, E. D.; Sitko, G. R.; Leonard, Y. M.; Freidinger, R. M.; Pettibone, D. J.; Bock, M. G. *Bioorg. Med. Chem. Lett.* **2008**, *18*, 716-720.
- <sup>6</sup> Mercia, S. G.; Bunce, N. J. *Can. J. Chem.* **1995**, *73*, 826-834.
- <sup>7</sup> Takeda, Kenichi; Sakurawi, K.; Ishii, H. *Tetrahedron* **1972**, *28*, 3757-3766.
- <sup>8</sup> Chu, Ying-Yuan; Yu, Chia-Sheng; Chen, Chiou-Juy; Yang, Kung-Shuo; Lain, Jung-Chaing; Lin, Chun-Hui; Chen, Kwunmin *J. Org. Chem.* **1999**, *64*, 6993-6998.
- <sup>9</sup> Cifuentes García, M. M.; García Ruano, J. L.; Martín Castro, A. M.; Rodríguez Ramos, J. H.; Fernández, I. *Tetrahedron: Asymmetry* **1998**, *9*, 859-864.
- <sup>10</sup> Barrett, A. G. M.; Graboski, G. G.; Russell, M. A. *J. Org. Chem.* **1986**, *51*, 1012-1015.
- <sup>11</sup> Shiuey, S. J.; Partridge, J. J.; Uskokovic, M. R. *J. Org. Chem.* **1988**, *50*, 1040-1046.
- <sup>12</sup> Gutman, A. L.; Meyer, E.; Boltanski, A. *Synth. Comm.* **1988**, *18*, 1311-22.
- <sup>13</sup> Tomooka, K.; Nakazaki, A.; Nakai, T. *J. Am. Chem. Soc.* **2000**, *122*, 408-409.
- <sup>14</sup> Su, T.; Zhu, B.-Y.; Kane-Maguire, K.; Scarborough, R. M.; Zhang, P. *PCT Int. Appl.* (2000), 2000071510.
- <sup>15</sup> Iizuka, M.; Kondo, Y. *Chem. Comm.* **2006**, *16*, 1739-1741.
- <sup>16</sup> Pietrancosta, N.; Quelever, G.; Laras, Y.; Garino, C.; Burlet, S.; Kraus, J. L. *Austr. J. Chem.* **2005**, *58*, 585-594.
- <sup>17</sup> Shu, M.; Loebach, J. L.; Parker, K. A.; Mills, S. G.; Chapman, K. T.; Shen, D.-M.; Malkowitz, L.; Springer, M. S.; Gould, S. L.; DeMartino, J. A.; Siciliano, S. J.; Di Salvo, J.; Lyons, K.; Pivnichny, J. V.; Kwei, G. Y.; Carella, A.; Carver, G.; Holmes, K.; Schleif, W. A.; Danzeisen, R.; Hazuda, D.; Kessler, J.; Lineberger, J.; Miller, M. D.; Emini, E. A. *Bioorg. & Med. Chem. Lett.* **2004**, *14*, 947-952.
- <sup>18</sup> Pietrancosta, N.; Quelever, G.; Laras, Y.; Garino, C.; Burlet, S.; Kraus, J. L. *Austr. J. Chem.* **2005**, *58*, 585-594.
- <sup>19</sup> Bekele, T.; Shah, M. H.; Wolfer, J.; Abraham, C. J.; Weatherwax, A.; Lectka, T. *J. Am. Chem. Soc.* **2006**, *128*, 1810-1811.
